# Supplementary material for: COL-3-Induced Molecular and Ultrastructural Alterations in K562 Cells
Source: MDPI journal article supplement (doi:10.3390/jpm12010042), 2022-01-04
Supplement: s1 [file s1]

## Supplementary Material

### COL-3-induced molecular and ultrastructural alterations in K562 cells

Mona Fares<sup>1,2</sup>, Sandra Oerther<sup>1,2</sup>, Kjell Hultenby<sup>3</sup>, Danica Gubrianska<sup>1,2</sup>, Ying Zhao<sup>1,2</sup>, Manuchehr Abedi-Valugherdi<sup>1,2</sup>, and Moustapha Hassan<sup>1,2\*</sup>

<sup>1</sup>Experimental Cancer Medicine, Division of Bio-molecular and Cellular Medicine (BCM), Novum, Karolinska Institutet, Stockholm, Sweden.

<sup>2</sup>Clinical Research Centre and Centre for Allogeneic Stem cell Transplantation, Karolinska University Hospital Huddinge, Sweden

<sup>3</sup>Department of Laboratory Medicine, Karolinska Institutet and Karolinska University Hospital, Stockholm, Sweden

Email: [mona.fares@sll.se](mailto:mona.fares@sll.se), [sandra.oerther@ki.se](mailto:sandra.oerther@ki.se), [Kjell.Hultenby@ki.se](mailto:Kjell.Hultenby@ki.se), [ying.zhao.1@ki.se](mailto:ying.zhao.1@ki.se), [manuchehr.abedi-valugherdi@ki.se](mailto:manuchehr.abedi-valugherdi@ki.se), [moustapha.hassan@ki.se](mailto:moustapha.hassan@ki.se)

\*Corresponding author:

Moustapha Hassan

Experimental Cancer Medicine, Bio-molecular and Cellular Medicine (BCM), Novum, Department of Laboratory Medicine, Karolinska University Hospital Huddinge, 14186, Stockholm, Sweden.

E-mail: [moustapha.hassan@ki.se](mailto:moustapha.hassan@ki.se)

Running title: Mechanism of COL-3 toxicity in K562 cells

Key words: K562 cells, paraptosis, programmed necrosis, COL-3, m-calpain.

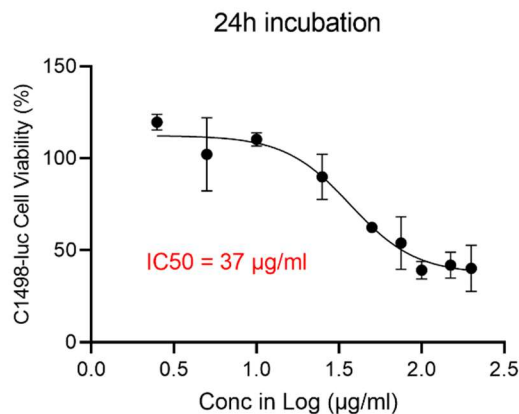

**Figure S1:** The effect of COL-3 on the viability of a mouse leukemic cell line C1498. Cell viability was studied using resazurin fluorescence WST-1 assay and expressed as percent of the control. Results are expressed as mean  $\pm$  SD.

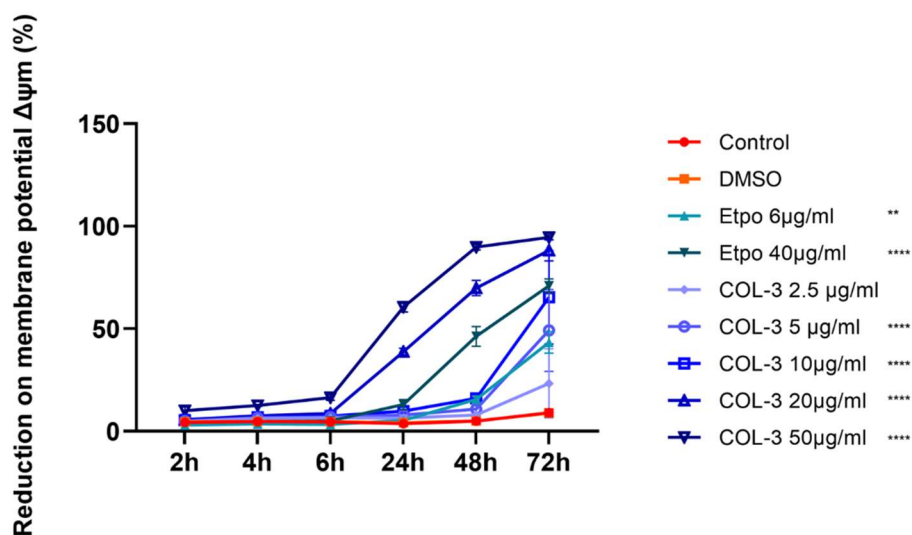

**Figure S2:** The loss of mitochondrial membrane potential ( $\Delta\Psi_m$ ) in COL-3-induced cell death. Mitochondrial membrane potential was assessed using tetramethylrhodamine methyl ester (TMRM) and flow cytometry. K562 cells were incubated with COL-3 in final concentrations of 2.5, 5, 10, 20 and 50  $\mu\text{g/ml}$  for 2, 4, 6, 24, 48 and 72 h. Cells incubated in DMSO in a final concentration of 0.2% were used as controls for solvent toxicity and cells incubated in complete medium served as controls. Results are presented as mean  $\pm$  SD of three independent experiments.

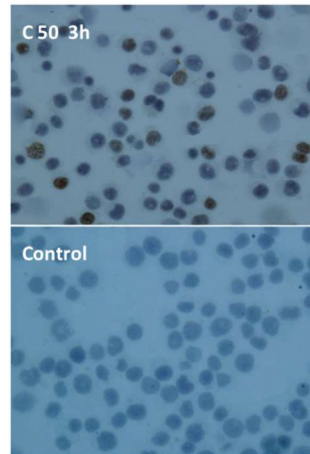

**Figure S3:** Immunocytochemistry of K562 cells treated with COL-3 at the concentrations of 50 µg/ml for 3 h. Cells incubated in complete medium are used as a control. Double strand breaks were detected with  $\gamma$ H2Ax staining. C = COL-3.

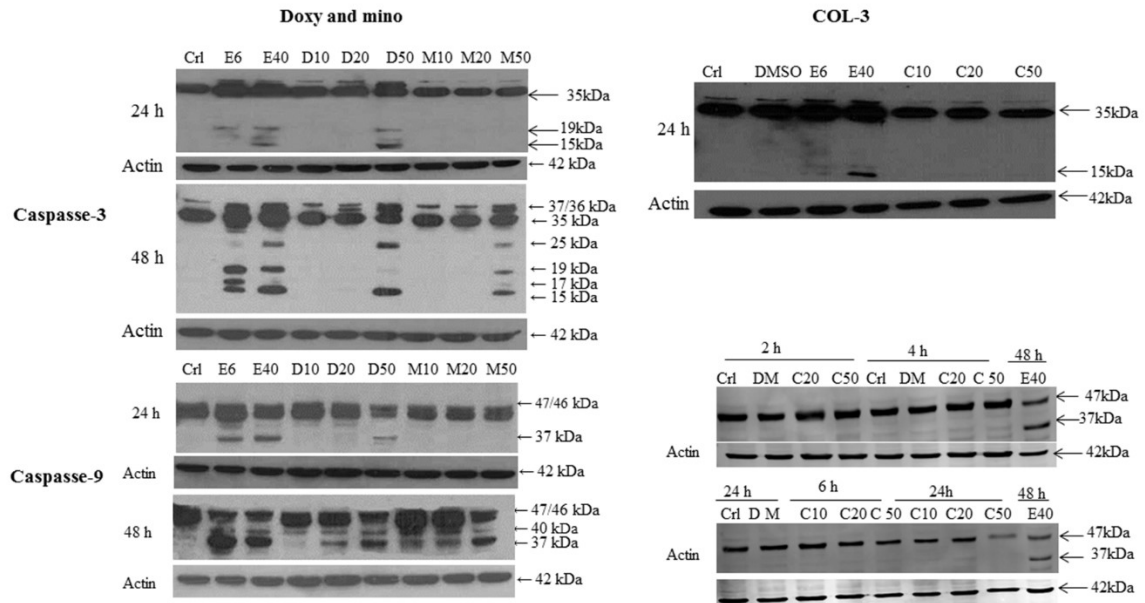

**Figure S4:** Caspase activation in doxycycline (Doxy), minocycline (Mino), COL-3 treated K562 cells. Cells were incubated with Doxy / Mino /COL-3 in concentrations of 10, 20 and 50  $\mu\text{g/ml}$ . Cells treated with etoposide in final concentrations of 6 or 40  $\mu\text{g/ml}$  served as controls for cell death and cells incubated in complete medium were used as controls. Specific protein bands were determined using PAGE and WB.  $\beta$ -actin was used a control of protein loading. CrI: control; D: doxycycline; M: minocycline; E: etoposide; C: COL-3; DM: DMSO.

A

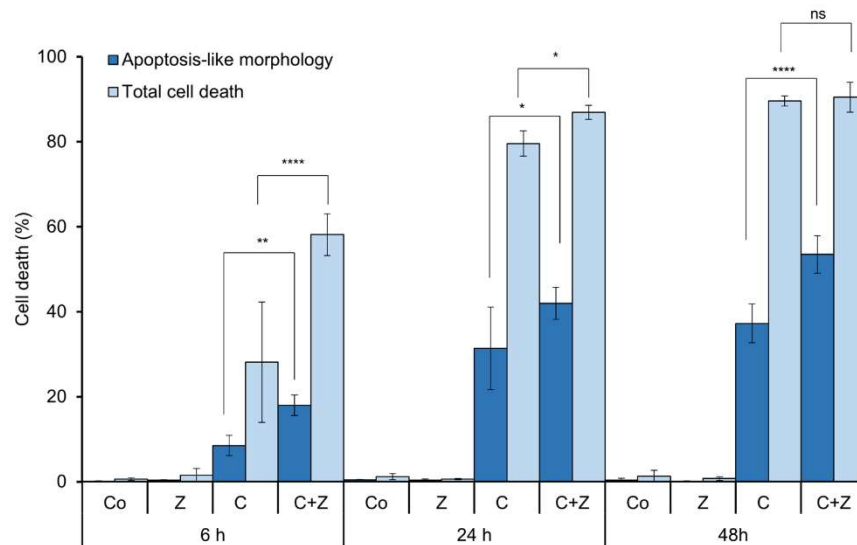

B

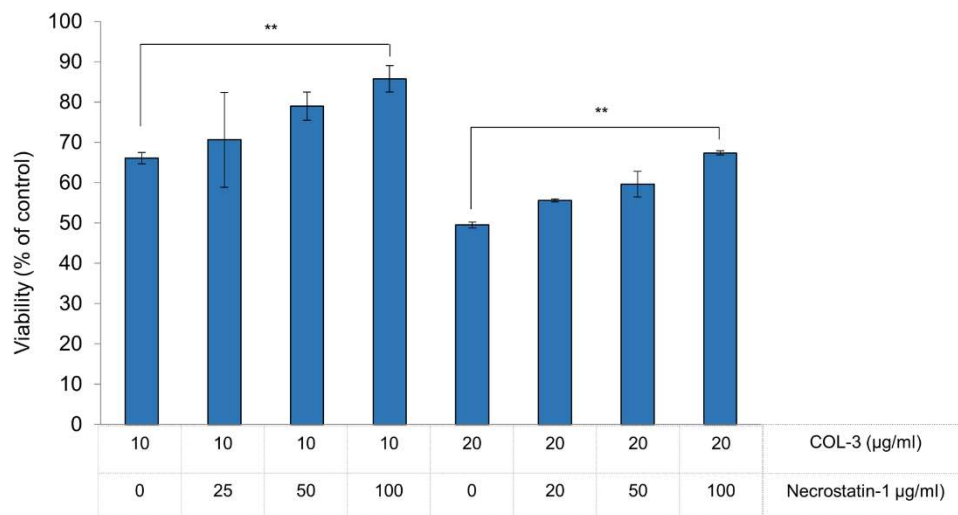

**Figure S5:** The effect of Z-VAD-FMK and necrostatin-1 on COL-3-induced K562 cell death. (A) K562 cells were incubated with Z-VAD-fmk with a final concentration of 100 µM for 1 h before treatment with COL-3 in a final concentration of 50 µg/ml for 6, 24 and 48 h. Cells incubated in 0.1% DMSO served as controls for solvent toxicity, cells incubated in complete medium as controls. Cell morphology was assessed on cytopun MGG stained slides. A minimum of 400 cells was counted per slide. (B). K562 cells were incubated with necrostatin-1 with a final concentration of 25, 50 and 100 µM for 1 h before treatment with COL-3 in a final concentration of 10 and 20 µg/ml for 24 h. Cells incubated in complete medium are used as a control. Cell viability was measured by MTT assay. Results are presented as mean ± SD

of three independent experiments. Co = control; C = COL-3; Z = Z-VAD-fmk. \*:  $P < 0.05$ ; \*\*:  $P < 0.01$ ; \*\*\*\*:  $P < 0.0001$ , and ns: not significant.

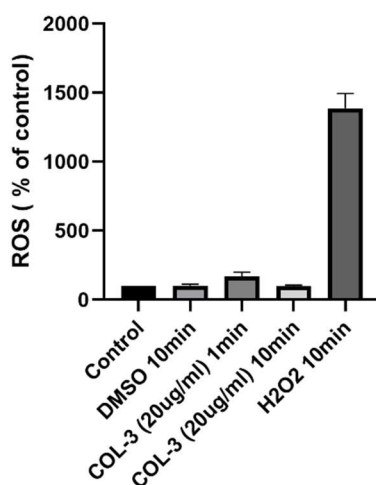

**Figure S6:** Intracellular ROS levels was measured by OxiSelect™ Intracellular ROS assay Kit. Cells were incubated with 100  $\mu$ M of 2'-7'-dichlorodihydrofluorescein (DCFH-DA) in media for 1 h at 37 °C, then treated with COL-3 at a final concentration of 20  $\mu$ g/ml for 1 and 10 min. DCF fluorescence intensity was measured at 485/520 nm wavelengths using FLUOstar Optima. Intracellular ROS levels showed no change following treatment with COL-3 (20  $\mu$ g/ml). H<sub>2</sub>O<sub>2</sub> (100 mM) was used as a positive control.

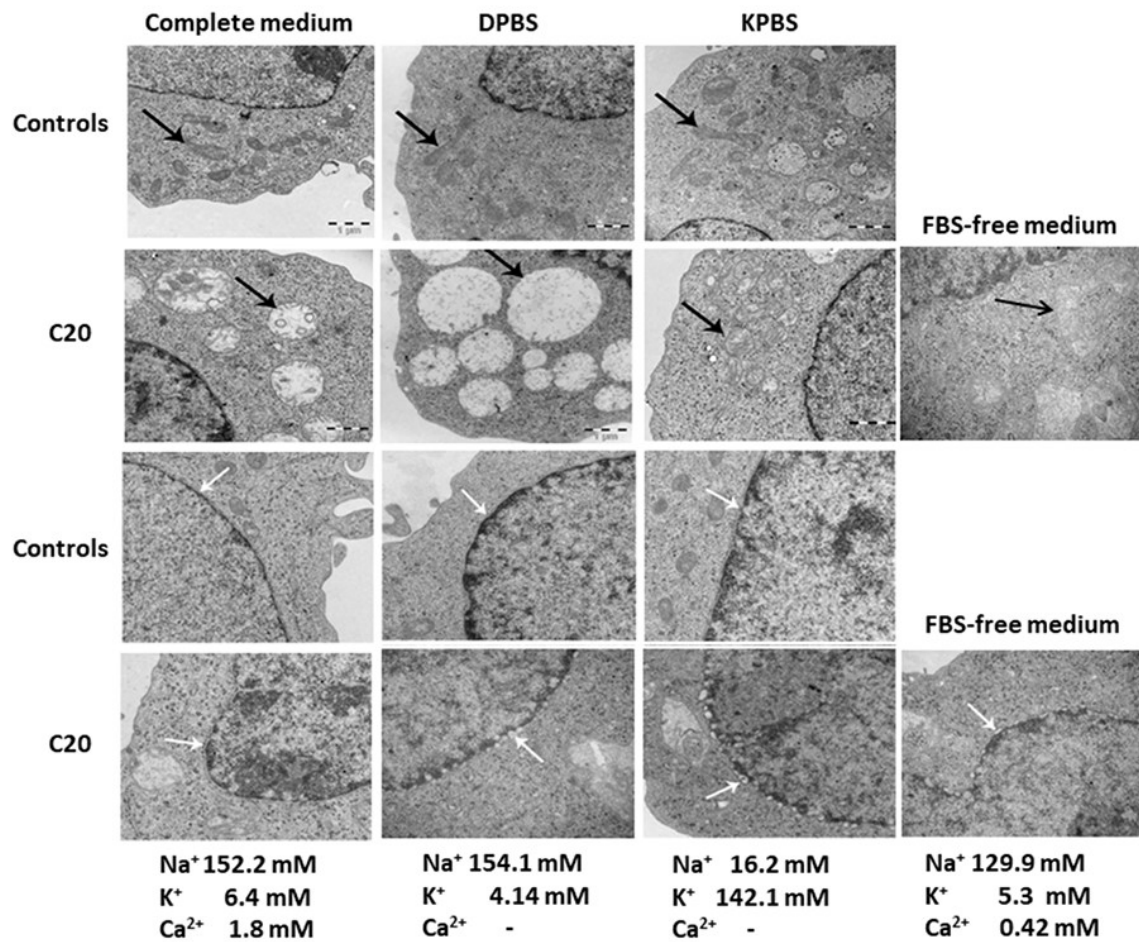

**Figure S7.** Effect of extracellular ions concentrations in COL-3 induced toxicity

Cells were treated with COL-3 in a final concentration of 20 µg/ml for 10 min in four different solutions: complete medium, Dulbecco's PBS (DPBS), potassium-rich PBS (KPBS) and FBS-free medium. Ultrathin sections were prepared in glutaraldehyde-fixed and osmium tetroxide-postfixed cells and analysed with TEM. The mitochondria (black arrow) and the nuclear envelop (white arrow) are presented.

**Supplementary Table 1: Characteristics of COL-3 induced cell death in K562 leukemic cells**

| <i>Observable parameter</i>    | <i>Apoptosis</i>    | <i>Necrosis</i>        | <i>Paraptosis</i>     | <i>Programmed necrosis</i> | <i>COL-3 20 µg/ml</i>                  | <i>COL-3 5 µg/ml</i>                   |
|--------------------------------|---------------------|------------------------|-----------------------|----------------------------|----------------------------------------|----------------------------------------|
| <i>Nuclear Fragmentation</i>   | +                   | -                      | -                     | -                          | -                                      | -                                      |
| <i>Chromatin condensation</i>  | +                   | -                      | -                     | +                          | +                                      | +                                      |
| <i>Apoptotic bodies</i>        | +                   | -                      | -                     | -                          | -                                      | -                                      |
| <i>Annexin V (early)</i>       | +                   | -                      | -                     | +                          | +                                      | -                                      |
| <i>Propidium iodide(early)</i> | -                   | +                      | -<br>Late +ve?        | +                          | +                                      | -                                      |
| <i>Cytoplasmic vacuolation</i> | -                   | +                      | +                     | -                          | -                                      | -                                      |
| <i>Mitochondrial swelling</i>  | +(sometimes)        | +                      | +(Late)               | +(Late??)                  | +                                      | +                                      |
| <i>ER swelling</i>             | -                   | -                      | +                     | -                          | +                                      | +                                      |
| <i>DNA fragmentation</i>       | +(internucleosomal) | +(diffuse)             | -                     | +(HMW)                     | Nuclear tAIF (+)                       | tAIF                                   |
| <i>Caspase-3 activation</i>    | +                   | -                      | -                     | -                          | -                                      | -                                      |
| <i>Caspase-9 activation</i>    | +(Apaf-1 dependent) | -                      | +(Apaf-1 independent) | -                          | +?<br>Zymogen<br>No Apaf-1<br>assembly | +?<br>Zymogen<br>No Apaf-1<br>assembly |
| <i>AIF processing</i>          | +(sometimes)        | -                      | -                     | +                          | +                                      | +                                      |
| <i>PARP cleavage</i>           | +(85kDa fragment)   | +(50-62 kDa fragments) | -                     | -                          | -                                      | -                                      |



|                                   |   |   |   |   |   |   |
|-----------------------------------|---|---|---|---|---|---|
| <i>Inhibition by<br/>zVAD.fmk</i> | + | - | - | - | - |   |
| <i>Bcl-xL<br/>inactivation</i>    | + | - | - | + | - | - |
| <i>Calpain<br/>activation</i>     | ± | - | ± | + | + | + |
